P3655

### Right ventricular volume off-loading following atrial septal defect closure or pulmonary valve replacement: impact on tricuspid regurgitation and mid-term remodeling

A.C. Martin Garcia<sup>1</sup>, K. Dimopoulos<sup>2</sup>, M. Boutsikou<sup>2</sup>, A. Kempny<sup>2</sup>, R. Alonso-Gonzalez<sup>2</sup>, L. Swan<sup>2</sup>, A. Uebing<sup>2</sup>, S.V. Babu-Narayan<sup>2</sup>, A. Martin-Garcia<sup>1</sup>, P.L. Sanchez-Fernandez<sup>1</sup>, J.C. Castro Garay<sup>1</sup>, W. Li<sup>2</sup>, D.F. Shore<sup>2</sup>, M.A. Gatzoulis<sup>2</sup>

<sup>1</sup>Hospital Clínico Universitario, Cardiology, Salamanca, Spain; <sup>2</sup>Royal Brompton Hospital, Adult Congenital Heart Centre and Centre for Pulmonary Hypertension, London, United Kingdom

**Introduction:** Cardiac surgery or catheter intervention is nowadays commonly performed to abolish volume loading of the right ventricle (RV) in adults with congenital heart disease (ACHD).

**Purpose:** Little is known, however, of their impact on the preexisting tricuspid regurgitation (TR) following such procedures (atrial septal defect [ASD] closure and pulmonary valve replacement [PVR]), which was the aim of our study.

**Methods:** Demographics, clinical and echocardiographic characteristics were analyzed from 162 consecutive patients undergoing such interventions between July 2005 and December 2014, who had at least mild preoperative TR.

**Results:** Mean age at intervention was 42±16 years (38.3% male); 101

patients underwent ASD closure, whereas 61 patients PVR. Only 11.1% receiving concomitant tricuspid valve surgery (repair). There was significant overall improvement in severity of TR, from 38 (23.5%) patients having moderate or severe TR preoperatively to only 11 (6.8%) and 20 (12.3%) at 6 and 12 months of follow-up, respectively (p<0.05) (Figure 1) (Table 1). Improvement in TR was observed in patients who did not have concomitant TV repair, from 15.3% to 6.9% and 11.8%, 6 and 12 months, respectively (p<0.05).

**Conclusions:** ASD closure or PVR are commonly associated with significant reduction of preoperative functional tricuspid regurgitation event amongst patients who did not undergo concomitant tricuspid valve surgery.

Echocardiographic data

|                                                                      | Echo 1 (baseline) | Echo 2 (6 months) | Echo 3 (12 months) | p-value <sup>†</sup> | <sup>‡</sup> Echo 1 | <sup>‡</sup> Echo 2 | <sup>‡</sup> Echo 3 |
|----------------------------------------------------------------------|-------------------|-------------------|--------------------|----------------------|---------------------|---------------------|---------------------|
| TR grade (none = 1, mild = 2, moderate = 3, severe = 4)              | 2.3±0.6           | 1.6±0.6           | 1.7±0.8            | <0.0001              | A                   | B                   | B                   |
| End-diastolic tricuspid annulus diameter (cm)                        | 4.3±0.6           | 3.6±0.6           | 3.5±0.5            | <0.0001              | A                   | B                   | B                   |
| Systolic tenting area (cm <sup>2</sup> )                             | 0.7±0.5           | 0.5±0.2           | 0.5±0.3            | <0.0001              | A                   | B                   | B                   |
| Coaptation distance (cm)                                             | 0.6±0.2           | 0.4±0.2           | 0.4±0.2            | <0.0001              | A                   | B                   | B                   |
| End-diastolic area (cm <sup>2</sup> )                                | 30.3±7.5          | 21.7±6.0          | 20.6±6.0           | <0.0001              | A                   | B                   | C                   |
| Fractional area change (%)                                           | 39.4±8.4          | 39.0±8.0          | 39.9±8.1           | 0.58                 | A                   | A                   | A                   |
| RV mid diameter (cm)                                                 | 4.2±0.7           | 3.3±0.7           | 3.2±0.6            | <0.0001              | A                   | B                   | B                   |
| RVOT end-diastolic proximal diameter (cm)                            | 4.4±0.6           | 3.8±0.6           | 3.6±0.5            | <0.0001              | A                   | B                   | C                   |
| TAPSE (cm)                                                           | 2.1±0.6           | 1.4±0.5           | 1.4±0.4            | <0.0001              | A                   | B                   | B                   |
| Lateral TDi S (cm/s)                                                 | 12.4±3.3          | 8.8±3.0           | 9.2±3.0            | <0.0001              | A                   | B                   | B                   |
| Systolic pulmonary artery pressure (mmHg)                            | 42.4±13.4         | 34.8±10.1         | 35.1±11.6          | <0.0001              | A                   | B                   | B                   |
| LVEF (normal = 1, mild LV dysfunction = 2, moderate = 3, severe = 4) | 1.0±0.2           | 1.0±0.2           | 1.0±0.2            | 0.80                 | A                   | A                   | A                   |
| RA area (cm <sup>2</sup> )                                           | 26.1±9.6          | 19.5±6.6          | 19.2±6.7           | <0.0001              | A                   | B                   | B                   |

<sup>†</sup>One-way ANOVA comparison. <sup>‡</sup>Tukey pairwise comparison between Echos 1, 2 and 3: means that do not share a letter are significantly different (i.e. p<0.05).

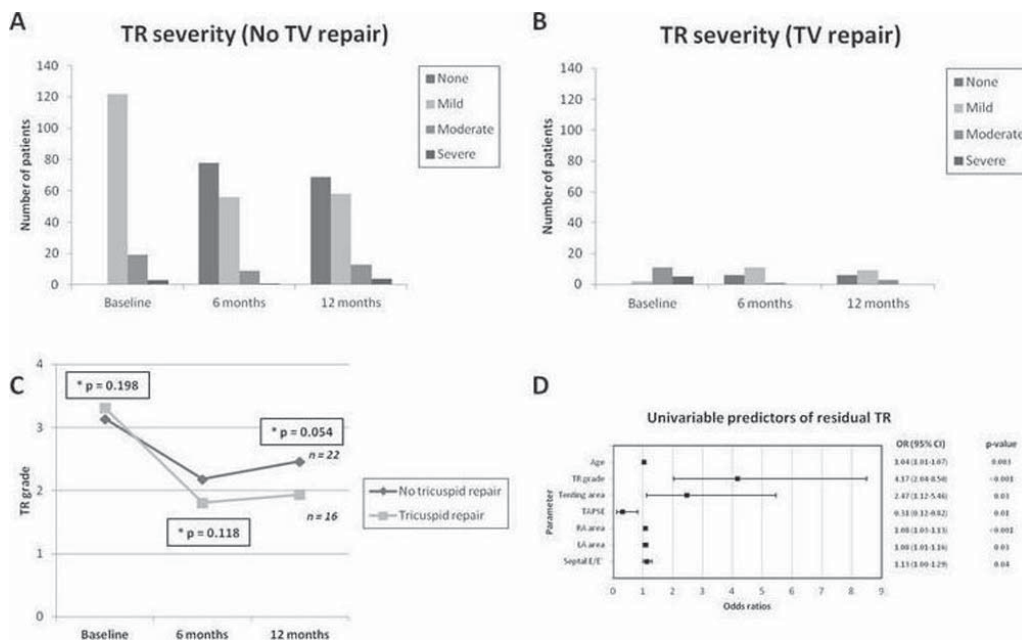

Figure 1
